# Supplementary material for: Self‐Reported Smoking, Urine Cotinine, and Risk of Cardiovascular Disease: Findings From the PREVEND (Prevention of Renal and Vascular End‐Stage Disease) Prospective Cohort Study
Source: PubMed Central journal article supplement — J Am Heart Assoc. 2018 May 2;7(10):e008726. doi: 10.1161/JAHA.118.008726 (PMC6015309; doi:10.1161/jaha.118.008726), 2018-05-02
Supplement: JAH3-7-e008726-s001.pdf [file JAH3-7-e008726-s001.pdf]

# **SUPPLEMENTAL MATERIAL**

**Table S1. STROBE 2007 Statement—Checklist of items that should be included in reports of cohort studies.**

| <b>Section/Topic</b>      | <b>Item #</b> | <b>Recommendation</b>                                                                                                           | <b>Reported on page #</b>   |
|---------------------------|---------------|---------------------------------------------------------------------------------------------------------------------------------|-----------------------------|
| <b>Title and abstract</b> | 1             | (a) Indicate the study's design with a commonly used term in the title or the abstract                                          | Page 1                      |
|                           |               | (b) Provide in the abstract an informative and balanced summary of what was done and what was found                             | Page 2                      |
| <b>Introduction</b>       |               |                                                                                                                                 |                             |
| Background/rationale      | 2             | Explain the scientific background and rationale for the investigation being reported                                            | Page 4                      |
| Objectives                | 3             | State specific objectives, including any prespecified hypotheses                                                                | Page 4                      |
| <b>Methods</b>            |               |                                                                                                                                 |                             |
| Study design              | 4             | Present key elements of study design early in the paper                                                                         | Study design and population |
| Setting                   | 5             | Describe the setting, locations, and relevant dates, including periods of recruitment, exposure, follow-up, and data collection | Study design and population |
| Participants              | 6             | (a) Give the eligibility criteria, and the sources and methods of selection of participants. Describe methods of follow-up      | Study design and population |
|                           |               | (b) For matched studies, give matching criteria and number of exposed and unexposed                                             | Not applicable              |

|                              |    |                                                                                                                                                                                      |                                          |
|------------------------------|----|--------------------------------------------------------------------------------------------------------------------------------------------------------------------------------------|------------------------------------------|
| Variables                    | 7  | Clearly define all outcomes, exposures, predictors, potential confounders, and effect modifiers. Give diagnostic criteria, if applicable                                             | Assessment of exposures and risk factors |
| Data sources/<br>measurement | 8* | For each variable of interest, give sources of data and details of methods of assessment (measurement). Describe comparability of assessment methods if there is more than one group | Assessment of exposures and risk factors |
| Bias                         | 9  | Describe any efforts to address potential sources of bias                                                                                                                            | Statistical analyses                     |
| Study size                   | 10 | Explain how the study size was arrived at                                                                                                                                            | Statistical analyses                     |
| Quantitative variables       | 11 | Explain how quantitative variables were handled in the analyses. If applicable, describe which groupings were chosen and why                                                         | Statistical analyses                     |
| Statistical methods          | 12 | (a) Describe all statistical methods, including those used to control for confounding                                                                                                | Statistical analyses                     |
|                              |    | (b) Describe any methods used to examine subgroups and interactions                                                                                                                  | Statistical analyses                     |
|                              |    | (c) Explain how missing data were addressed                                                                                                                                          | Not applicable                           |
|                              |    | (d) If applicable, explain how loss to follow-up was addressed                                                                                                                       | Not applicable                           |

|                  |     |                                                                                                                                                                                                              |                             |
|------------------|-----|--------------------------------------------------------------------------------------------------------------------------------------------------------------------------------------------------------------|-----------------------------|
|                  |     | (e) Describe any sensitivity analyses                                                                                                                                                                        | Statistical analyses        |
| <b>Results</b>   |     |                                                                                                                                                                                                              |                             |
| Participants     | 13* | (a) Report numbers of individuals at each stage of study—eg numbers potentially eligible, examined for eligibility, confirmed eligible, included in the study, completing follow-up, and analysed            | Study design and population |
|                  |     | (b) Give reasons for non-participation at each stage                                                                                                                                                         | Study design and population |
|                  |     | (c) Consider use of a flow diagram                                                                                                                                                                           | Study design and population |
| Descriptive data | 14* | (a) Give characteristics of study participants (eg demographic, clinical, social) and information on exposures and potential confounders                                                                     | Results; Table 1            |
|                  |     | (b) Indicate number of participants with missing data for each variable of interest                                                                                                                          |                             |
|                  |     | (c) Summarise follow-up time (eg, average and total amount)                                                                                                                                                  | Results                     |
| Outcome data     | 15* | Report numbers of outcome events or summary measures over time                                                                                                                                               | Results                     |
| Main results     | 16  | (a) Give unadjusted estimates and, if applicable, confounder-adjusted estimates and their precision (eg, 95% confidence interval). Make clear which confounders were adjusted for and why they were included | Results; Tables 2 and 4     |
|                  |     | (b) Report category boundaries when continuous variables were categorized                                                                                                                                    | Results; Tables 2 and 4     |

|                          |    |                                                                                                                                                                            |                      |
|--------------------------|----|----------------------------------------------------------------------------------------------------------------------------------------------------------------------------|----------------------|
|                          |    | (c) If relevant, consider translating estimates of relative risk into absolute risk for a meaningful time period                                                           |                      |
| Other analyses           | 17 | Report other analyses done—eg analyses of subgroups and interactions, and sensitivity analyses                                                                             | Results; Tables 5-10 |
| <b>Discussion</b>        |    |                                                                                                                                                                            |                      |
| Key results              | 18 | Summarise key results with reference to study objectives                                                                                                                   | Discussion           |
| <b>Limitations</b>       |    |                                                                                                                                                                            |                      |
| Interpretation           | 20 | Give a cautious overall interpretation of results considering objectives, limitations, multiplicity of analyses, results from similar studies, and other relevant evidence | Discussion           |
| Generalisability         | 21 | Discuss the generalisability (external validity) of the study results                                                                                                      | Discussion           |
| <b>Other information</b> |    |                                                                                                                                                                            |                      |
| Funding                  | 22 | Give the source of funding and the role of the funders for the present study and, if applicable, for the original study on which the present article is based              | Page 15-16           |
